# Supplementary material for: Synergistically optimizing electrocaloric effect over a wider temperature span utilizing structural overlap zone
Source: Royal Society of Chemistry journal article supplement (doi:10.1039/d3tc04051h), 2024-01-01
Supplement: d3tc04051h1.pdf [file d3tc04051h1.pdf]

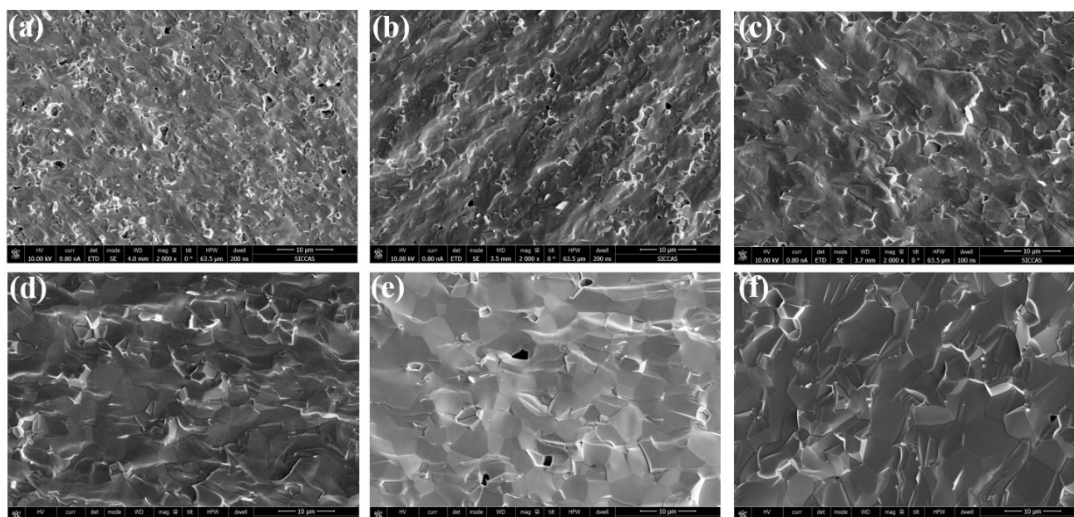

Fig. S1 cross-section SEM images of PLZT ceramics ( $x=0.4-0.14$ ).

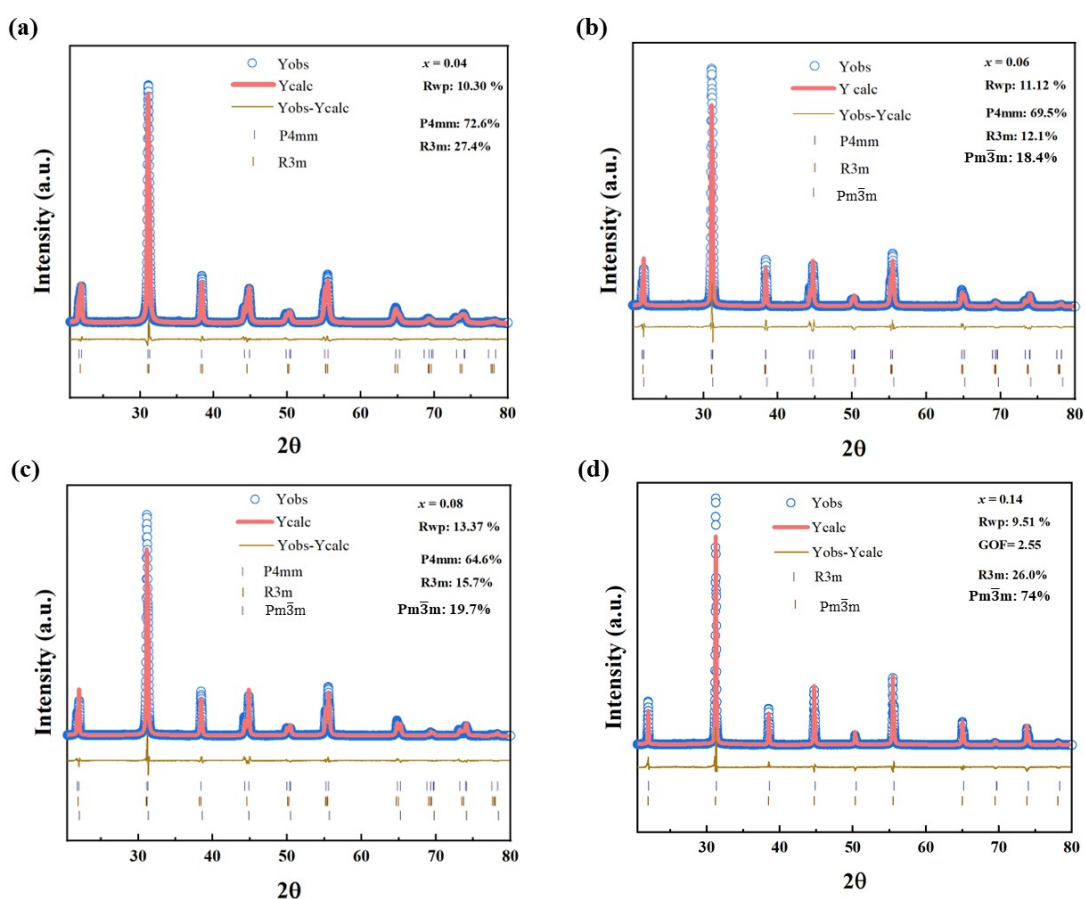

Fig. S2. (a-d) Rietveld refinement of XRD results for  $x=0.04, 0.06, 0.08, 0.14$

Table S1: Lattice parameter and refined structure parameter of PLZT(x) ceramics

| Sample | Phase1,<br>P4mm                | Phase 2,<br>R3c                | Phase 3,<br>Pmm         | Phase fraction                          | Fitting<br>parameter |
|--------|--------------------------------|--------------------------------|-------------------------|-----------------------------------------|----------------------|
| x=0.04 | a=b=4.04<br>c=4.09<br>V=66.896 | a=b=5.76<br>c=7.01<br>V=201.44 | —                       | P4mm=72.6%<br>R3m=27.4%                 | Rwp=10.3%            |
| x=0.06 | a=b=4.05<br>c=4.08<br>V=66.895 | a=b=5.76<br>c=7.01<br>V=201.44 | a=b=c=4.04<br>V=66.22   | P4mm=69.47%<br>R3m=12.15%<br>Pmm=18.38% | Rwp=11.12%           |
| x=0.08 | a=b=4.04<br>c=4.09<br>V=67.044 | a=b=5.76<br>c=7.01<br>V=201.44 | a=b=c=4.04<br>V=66.22   | P4mm=69.47%<br>R3m=12.15%<br>Pmm=18.38% | Rwp=13.37%           |
| x=0.10 | a=b=4.05<br>c=4.08<br>V=66.936 | a=b=5.76<br>c=7.01<br>V=201.44 | a=b=c=4.045<br>V=66.216 | P4mm=63.24%<br>R3m=9.6%<br>Pmm=27.14%   | Rwp=12.74%           |
| x=0.12 | —                              | a=b=5.76<br>c=7.01<br>V=201.44 | a=b=c=4.059<br>V=66.874 | R3m=30.5%<br>Pmm=69.5%                  | Rwp=10.30%           |
| x=0.14 | —                              | a=b=5.76<br>c=7.01<br>V=201.44 | a=b=c=4.059<br>V=66.877 | R3m=26%<br>Pmm=74%                      | Rwp=9.51%            |

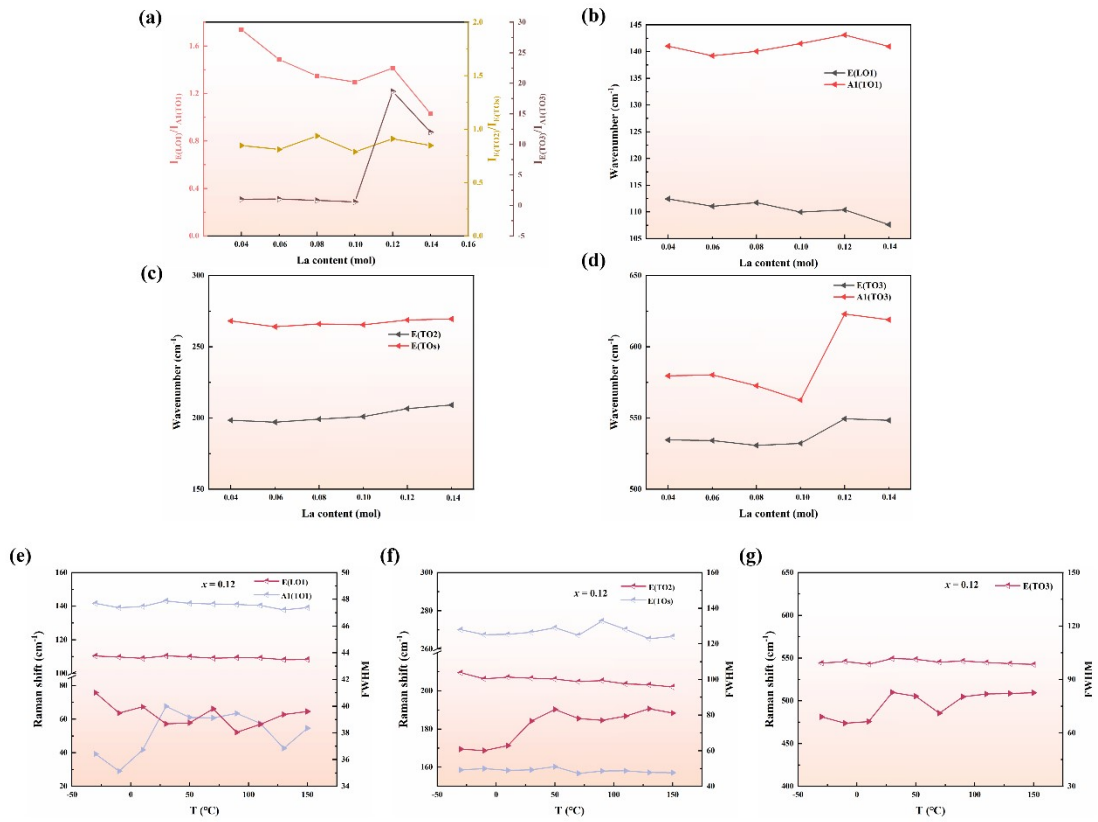

Fig. S3 The evolution of (a) the intensity ration and (b-d) Raman shift of E and A modes as a function of La content in PLZT ceramics. The variance of Raman shift and full width at half maximum (FWHM) from -30 °C to 150 °C for  $x=0.12$  sample in (e-g) E and A modes, respectively.

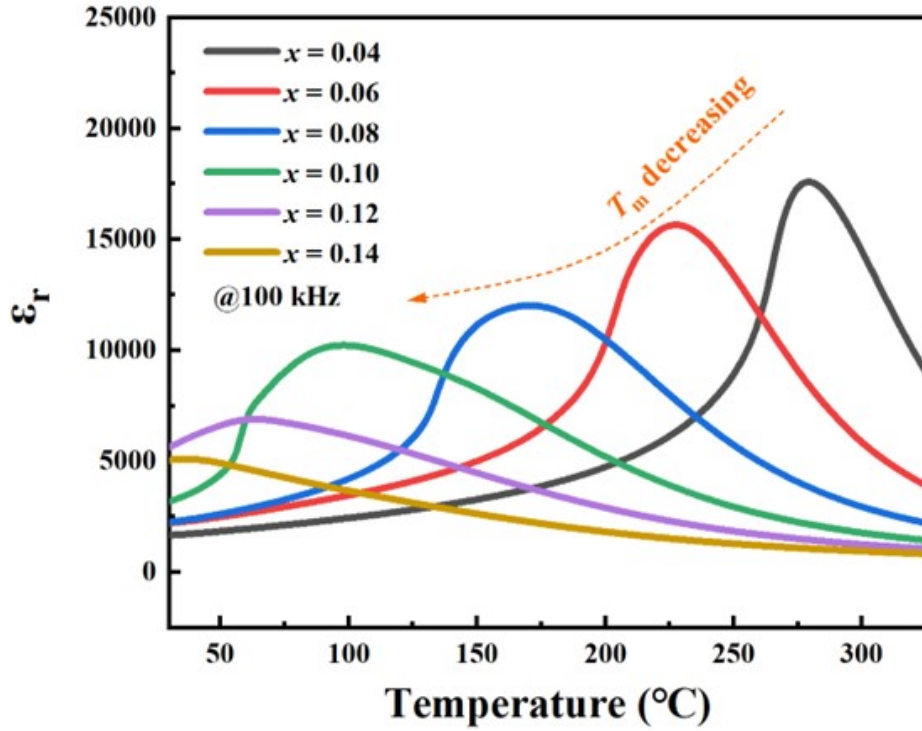

Fig. S4. Temperature-dependence  $\epsilon_r$ - $T$  curves for PLZT ( $x=0.04 \sim 0.14$ ) ceramics at 100 kHz.

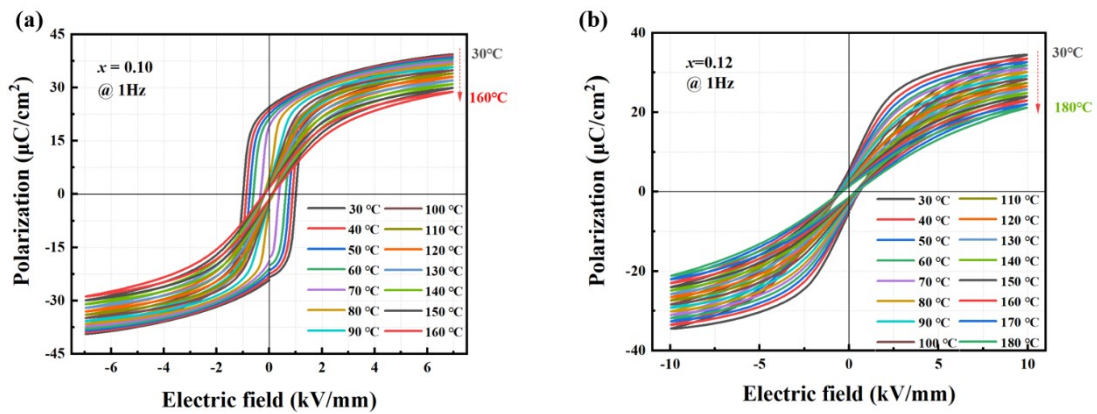

Fig. S5. (a-b) Temperature-dependence P-E loops for PLZT ( $x=0.10, 0.12$ ) ceramics.



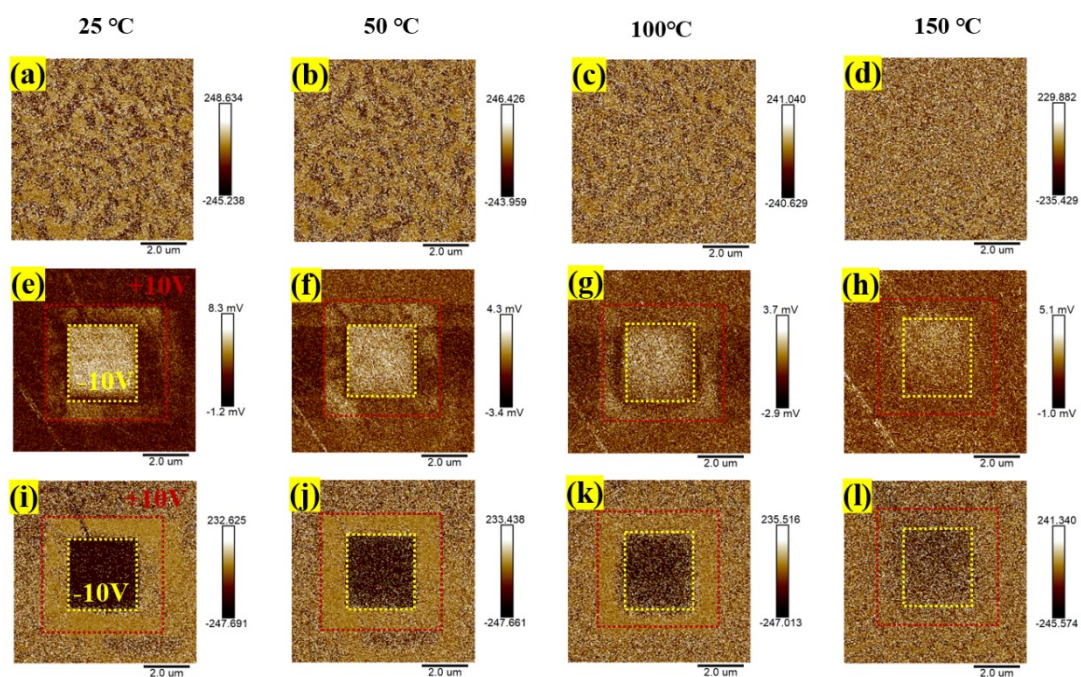

Fig. S6 (a-d) in situ variable temperature in PFM phase images for PLZT ( $x=0.10$ ); in situ variable temperature in PFM amplitude images (e-h) and phase images (i-l).

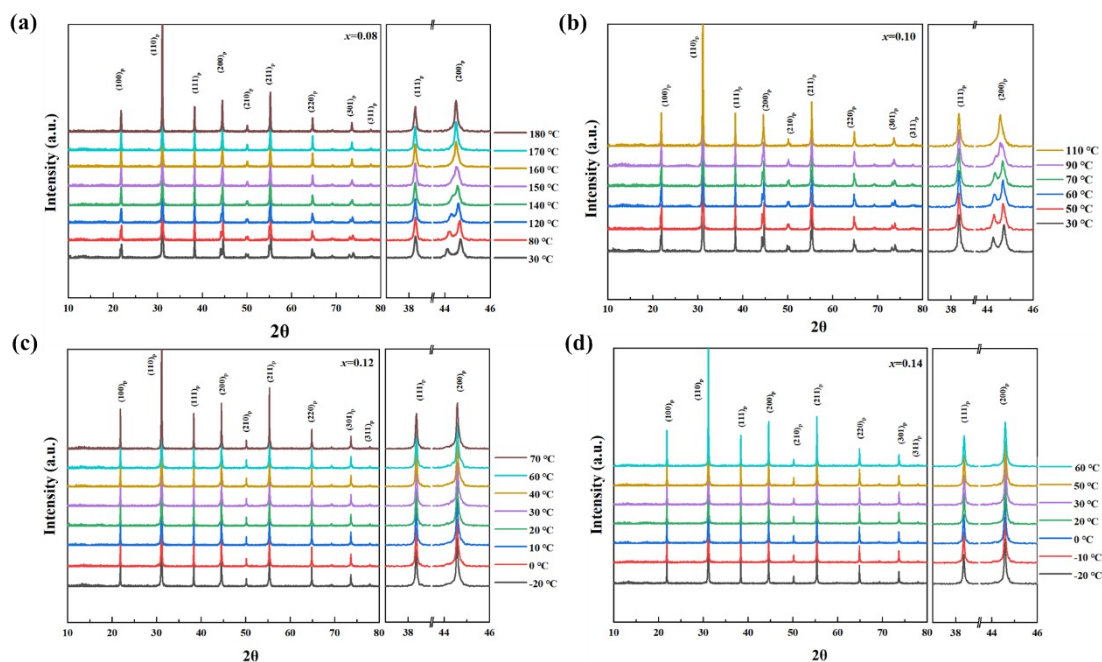

Fig. S7. In-situ temperature-dependence X-Ray diffraction for PLZT ( $x$ ) ceramics: (a)  $x=0.08$ ; (b)  $x=0.10$ ; (c)  $x=0.12$ ; (d)  $x=0.14$ .
